# Supplementary material
Source: PubMed Central journal article supplement (PMC7018387)

Supplementary Figure 1

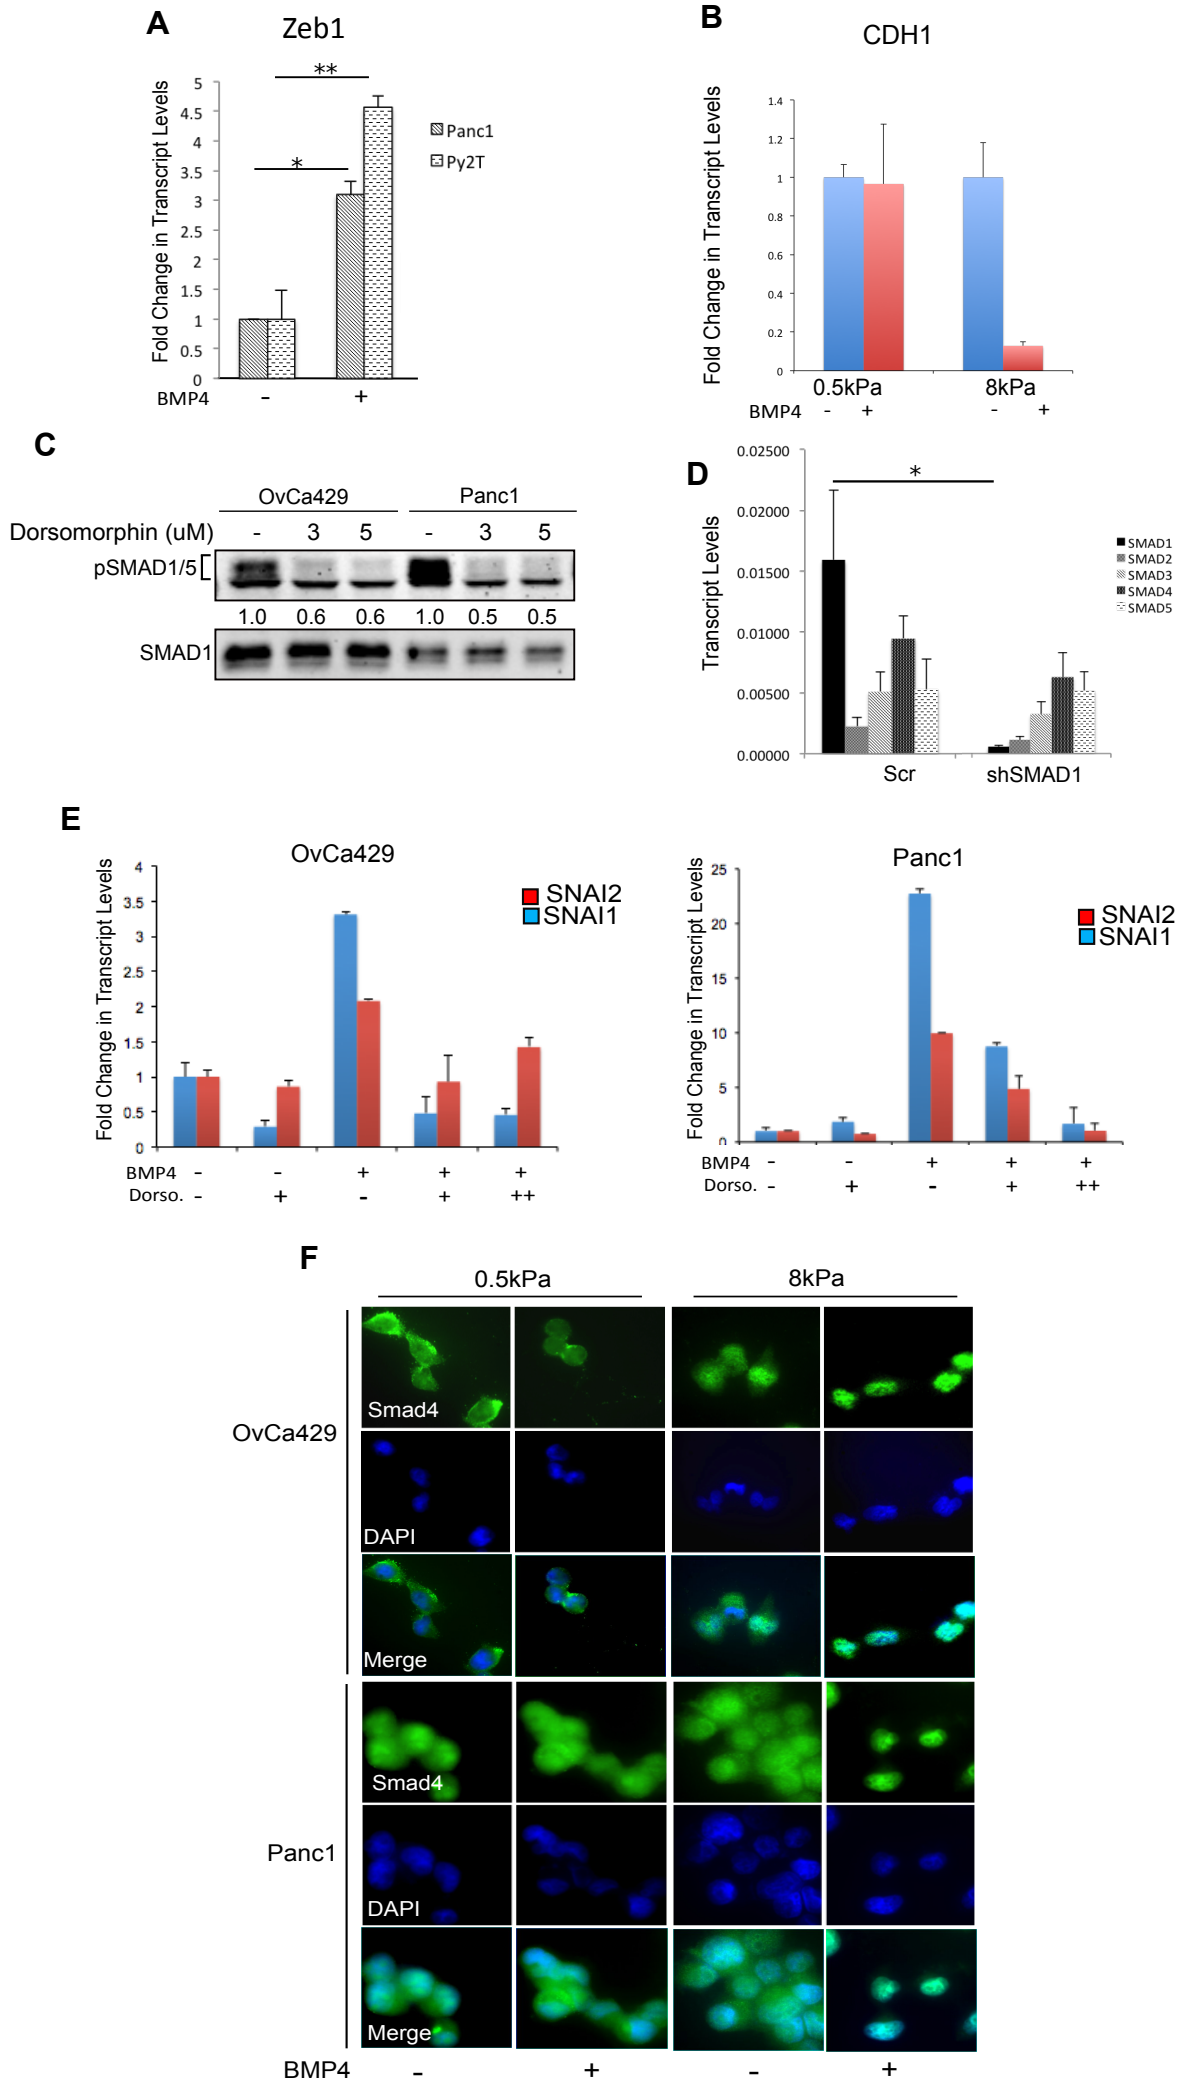

Supplement: NIHMS1014162-supplement-Supp_Figure_1.pdf [file NIHMS1014162-supplement-Supp_Figure_1.pdf]

# Supplementary Figure 2

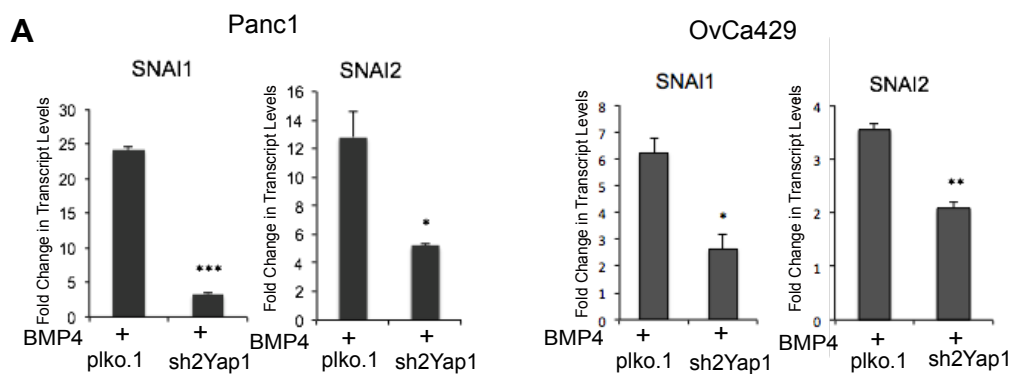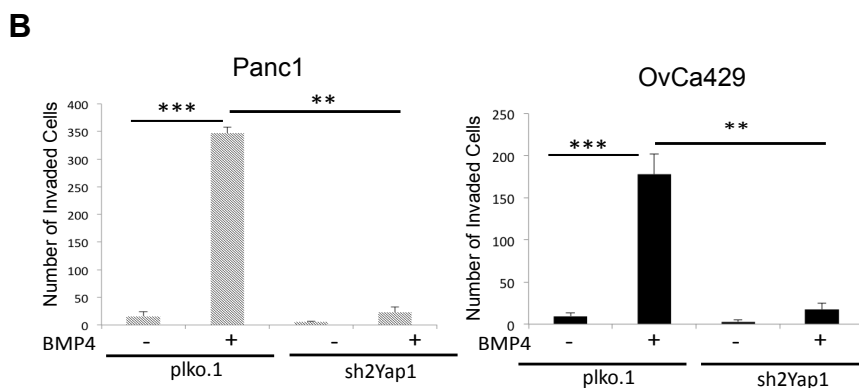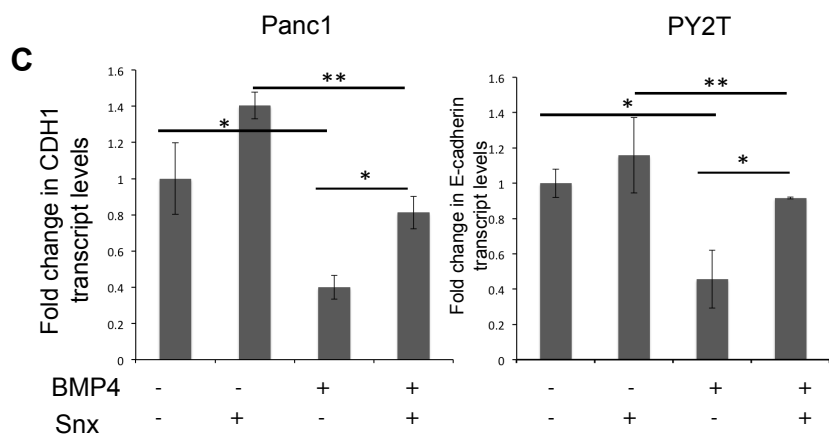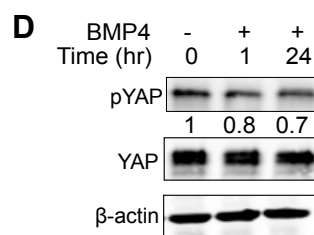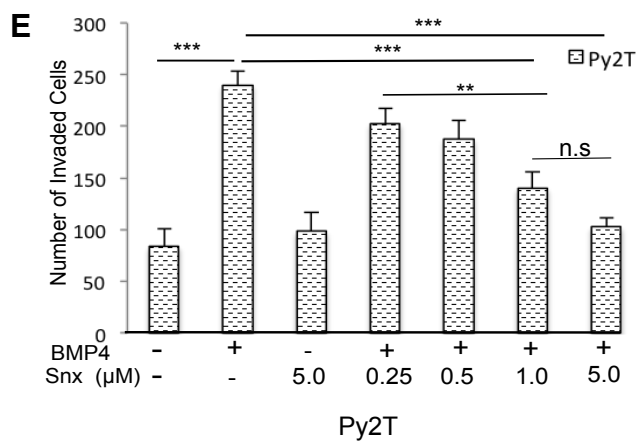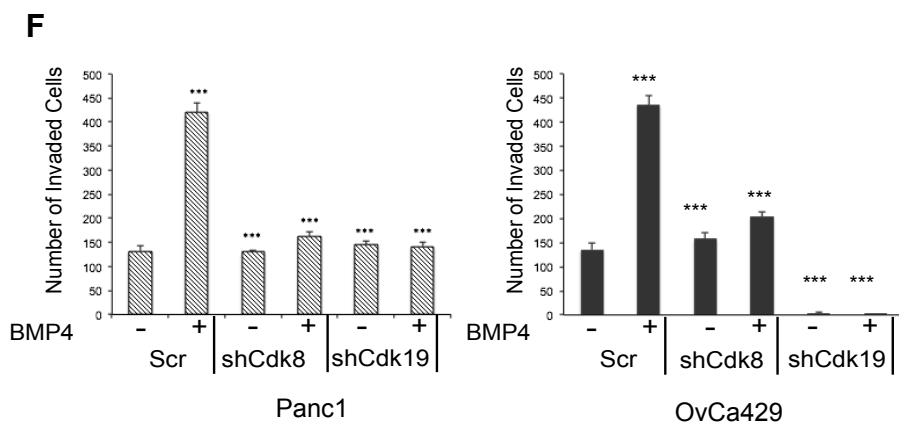

Supplement: NIHMS1014162-supplement-Supp_Figure_2.pdf [file NIHMS1014162-supplement-Supp_Figure_2.pdf]

# Supplementary Figure 3

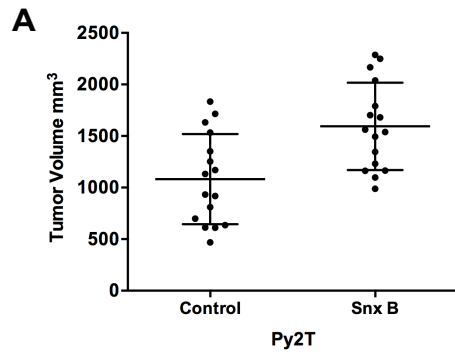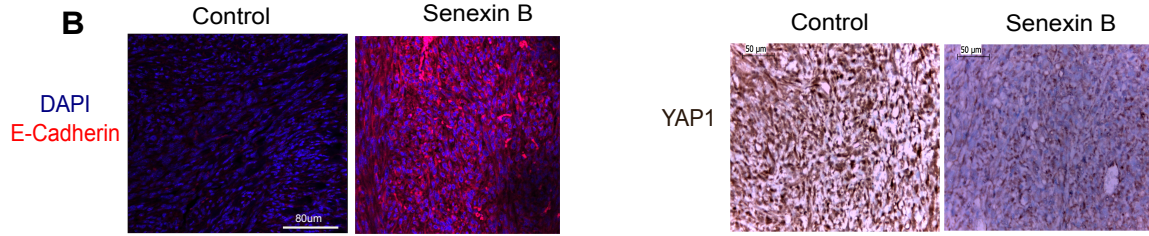

Supplement: NIHMS1014162-supplement-Supp_figure_3.pdf [file NIHMS1014162-supplement-Supp_figure_3.pdf]
